# Supplementary material for: C/EBPβ-LIP induces cancer-type metabolic reprogramming by regulating the let-7/LIN28B circuit in mice
Source: Commun Biol. 2019 Jun 14;2:208. doi: 10.1038/s42003-019-0461-z (PMC6572810; doi:10.1038/s42003-019-0461-z)
Supplement: Supplementary file 2 — Supplementary Information [file 42003_2019_461_MOESM2_ESM.pdf]

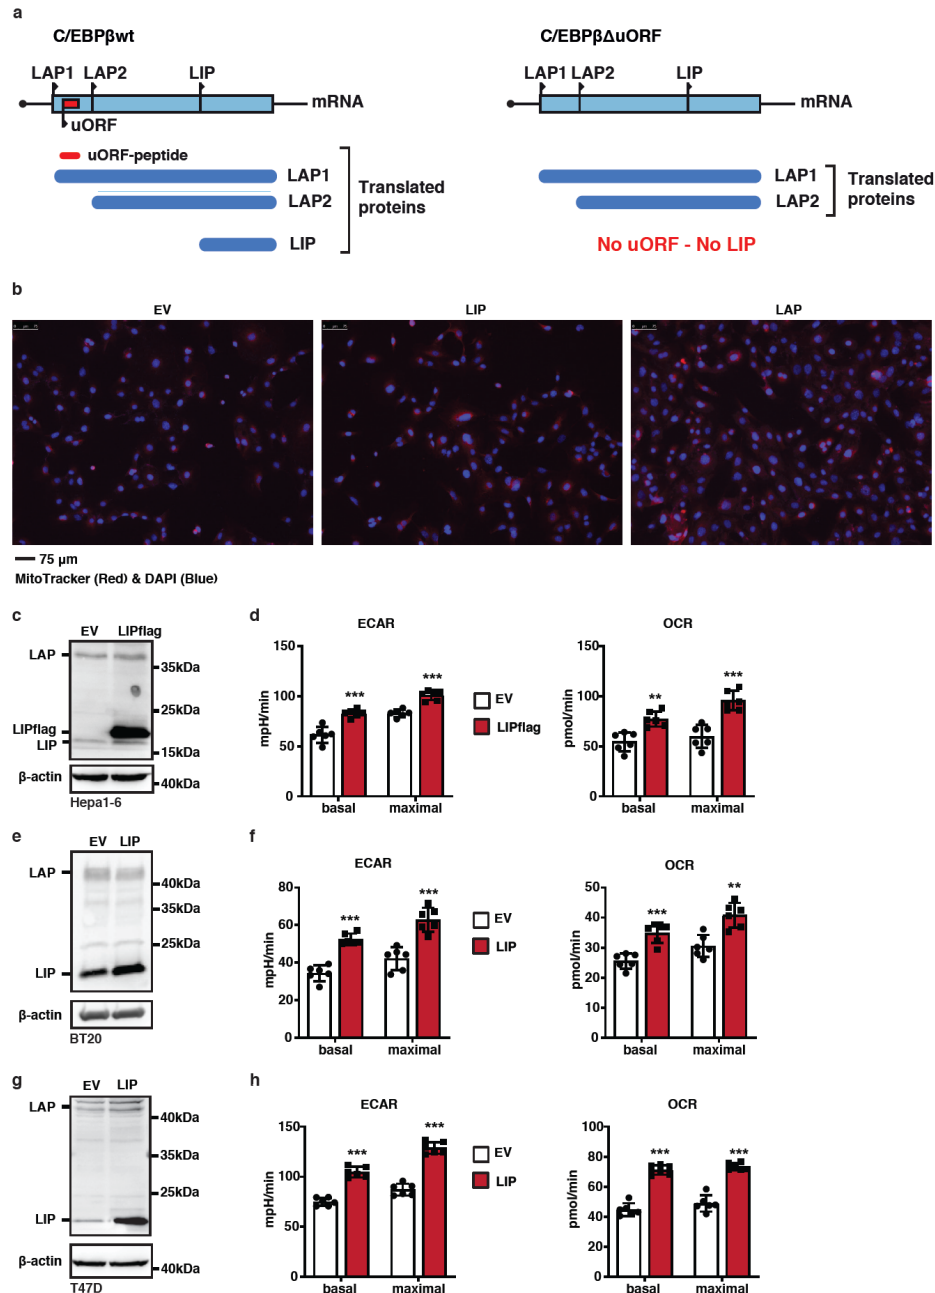

**Supplementary Figure 1** C/EBP $\beta$ -LAP and -LIP isoforms regulate cellular metabolism. **a** Schematic representation of the C/EBP $\beta$  isoform expression in wt and C/EBP $\beta$  $\Delta$ uORF MEFs. **b** Microscopic pictures from *Cebp $\beta$* -ko MEFs with control empty vector (EV) or ectopic expression of LIP or LAP stained with MitoTracker (red) and DAPI (blue). **c** Immunoblot analysis of C/EBP $\beta$ -LAP and C/EBP $\beta$ -LIP expression in human hepatocellular carcinoma cell line Hepa1-6 ectopically expressing LIPflag compared to control (EV).  $\beta$ -actin is used for loading control. Uncropped images are shown in Supplementary Fig. 7. **d** ECAR and OCR of Hepa1-6 cells ectopically expressing LIPflag compared to control (EV)(n=6). **e** Immunoblot analysis of C/EBP $\beta$ -LAP and C/EBP $\beta$ -LIP expression in human breast cancer cell line BT20 ectopically expressing LIP compared to control (EV).  $\beta$ -actin is used for loading control. Uncropped images are shown in Supplementary Fig. 7. **f** ECAR and OCR of BT20 cells ectopically expressing LIP compared to control (EV)(n=6). **g** Immunoblot analysis of C/EBP $\beta$ -LAP and C/EBP $\beta$ -LIP expression in human breast cancer cell line T47D ectopically expressing LIP compared to control (EV).  $\beta$ -actin is used for loading control. Uncropped images are shown in Supplementary Fig. 7. **h** ECAR and OCR of T47D cells ectopically expressing LIP compared to control (EV)(n=6). Statistical differences were analyzed by Student's t-tests. Error bars represent  $\pm$ SD, \*P<0.05, \*\*P<0.01, \*\*\*P<0.001.

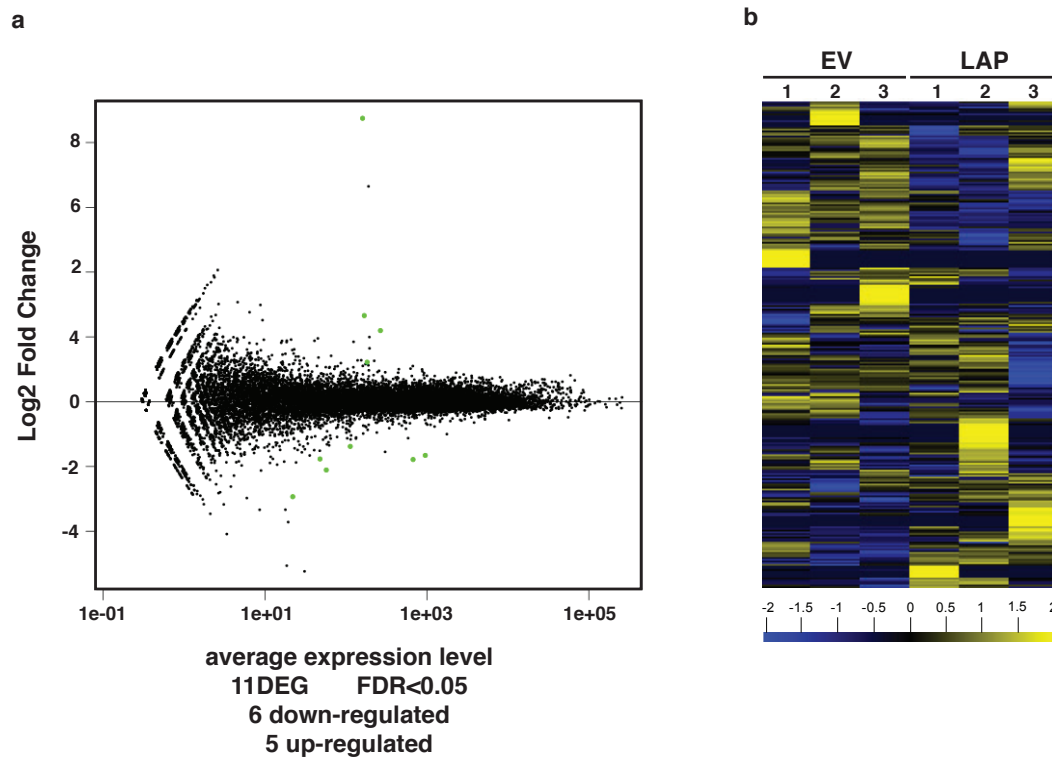

**Supplementary Figure 2** LIP differential regulates transcriptome and proteome. **a** Differential expressed genes (DEG) by ectopic expression of LAP in *Cebpb*-ko MEFs compared to control (empty vector (EV)) with an FDR < 0.05. **b** Heatmap representation of differential expressed proteins by LAP expression in *Cebpb*-ko MEFs compared to EV control (z-score).

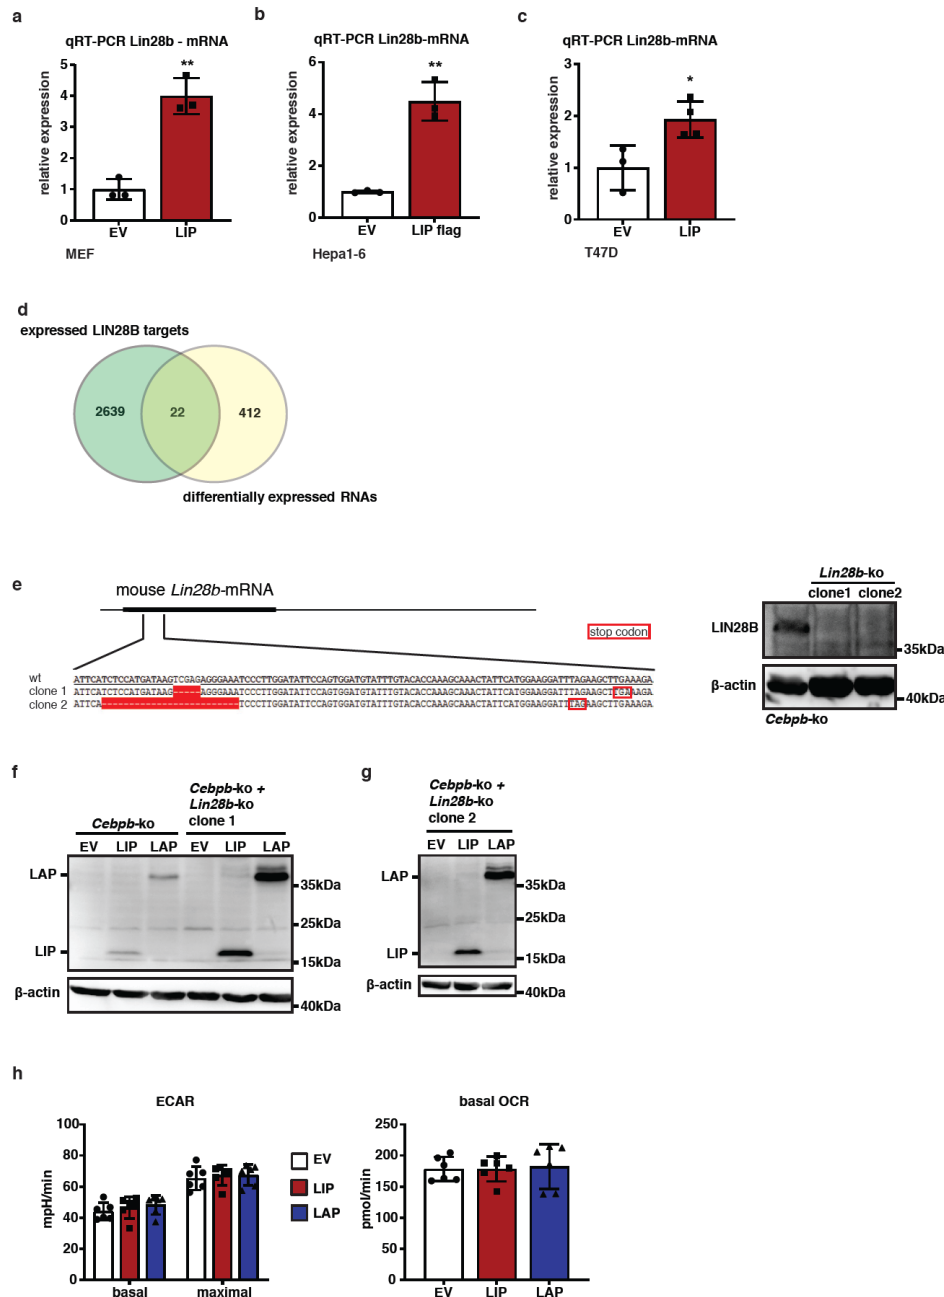

**Supplementary Figure 3** LIP requires *Lin28b* to regulate cellular metabolism. **a** Relative *Lin28b*-mRNA expression levels by qRT-PCR (n=3) in wt MEFs expressing LIP compared to control (EV). **b** Relative *Lin28b*-mRNA expression levels by qRT-PCR (n=3) in Hepa1-6 cells expressing LIPflag compared to control (EV), **c** Relative *Lin28b*-mRNA expression levels by qRT-PCR (n=3) in T47D cells expressing LIP compared to control (EV). **d** Venn diagram showing overlap between LIP-regulated mRNAs (transcriptome) and LIN28B targets. **e** *Lin28b* sequence of clones 1 and 2 with CRISPR/Cas9 induced deletions in the LIN28B coding sequence that result in downstream in-frame stop codons. Immunoblot analysis at the right shows lack of LIN28B protein expression in both clones. Uncropped images are shown in Supplementary Fig. 7. **f** Left half of the immunoblot analysis shows LIP and LAP expression in *Cebpb*-ko MEFs, with ectopic expression of LIP, or LAP. Right half of the blot shows same MEFs with additional *Lin28b*-ko (clone1). Uncropped images are shown in Supplementary Fig. 7. **g** Same analysis as in G for clone 2. β-actin is used for loading control. Uncropped images are shown in Supplementary Fig. 7. **h** Basal ECAR and OCR of, *C/EBPβ*-KO MEFs (EV), *Cebpb*-ko MEFs with ectopic expression of LIP or LAP and additional *Lin28b*-ko for clone 2(n=6). Statistical differences were analyzed by Student's t-tests. Error bars represent ±SD, \*P<0.05, \*\*P<0.01, \*\*\*P<0.001.

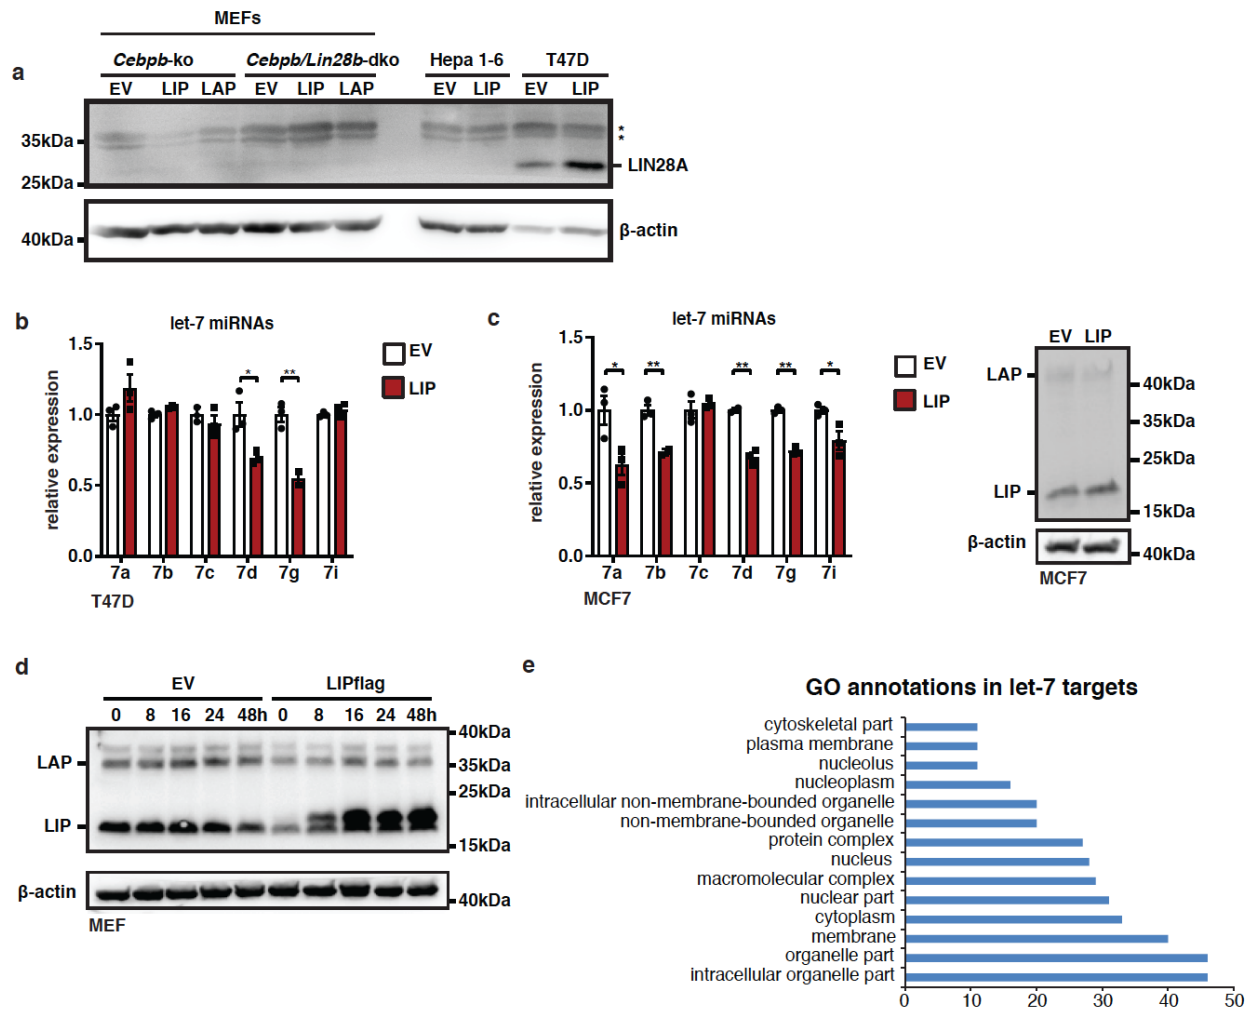

**Supplementary Figure 4** LIP regulates *let-7* miRNAs. **a** Immunoblot analysis using a LIN28A specific antibody with extracts from different cell lines as indicated (bands marked with \* represent unspecific signals). Uncropped images are shown in Supplementary Fig. 7. **b** Expression levels of *let-7a*, *b*, *c*, *d*, *g* and *i* in T47D cells ectopically expressing LIP compared to control (EV)(n=3). For LAP and LIP protein expression see immunoblot Figure S1g. **c** Expression levels of *let-7a*, *b*, *c*, *d*, *g* and *i* in MCF7 cells ectopically expressing LIP compared to control (EV)(n=3). Immunoblot analysis shows LAP and LIP protein expression and β-actin as loading control. Uncropped images are shown in Supplementary Fig. 7. **d** Immunoblot analysis of LAP and LIP expression in control MEFs (EV) and upon cumate-inducible expression of LIPflag using wt MEFs. β-actin is used for loading control. Uncropped images are shown in Supplementary Fig. 7. **e** (GOBP annotations of *let-7* targets that are upregulated in the LIP proteome. Statistical differences were analyzed by Student's t-tests. Error bars represent ±SD, \*P<0.05, \*\*P<0.01.

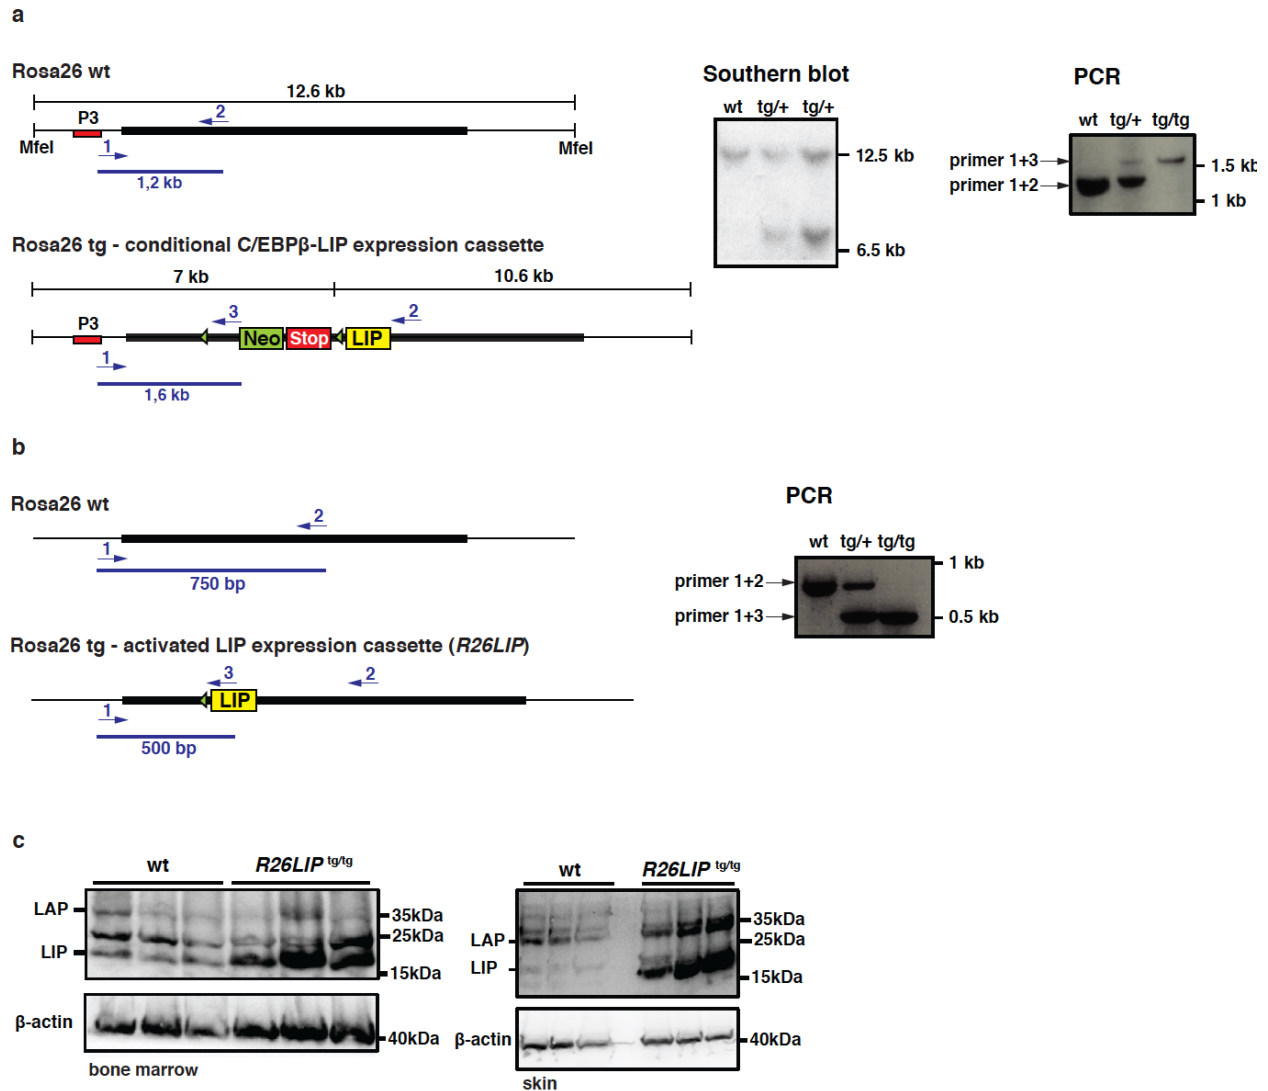

**Supplementary Figure 5** LIP regulates let-7/LIN28B *in vivo*. **a** Schematic visualization of Rosa26 locus before and after adding an conditional LIP expression cassette. P3 marks the area where the southern blot probe binds and the arrows 1 to 3 mark the primers that are used for genotyping. Pictures of the southern blot film and genotyping PCR gel shows successful modification of the loci. **b** Schematic visualization of Rosa26 locus without and with the activated LIP expression cassette. The arrows 1 to 3 mark the primers that are used for genotyping. The genotyping PCR gel show successful modification of the loci. **c** Immunoblot analysis of LAP and LIP for wt and *R26LIP* mice of bone marrow, skin and spleen. Uncropped images are shown in Supplementary Fig. 7.

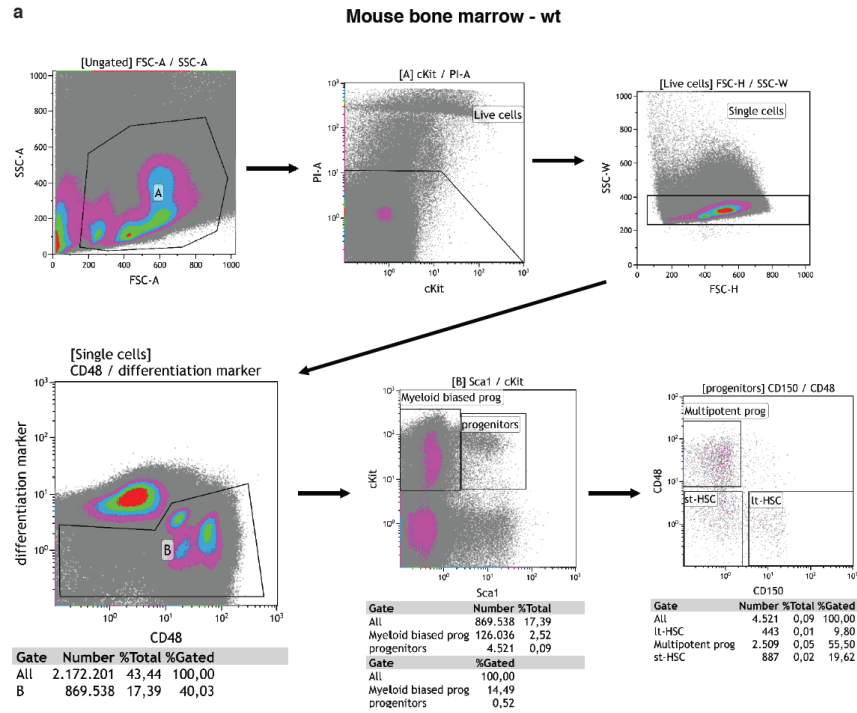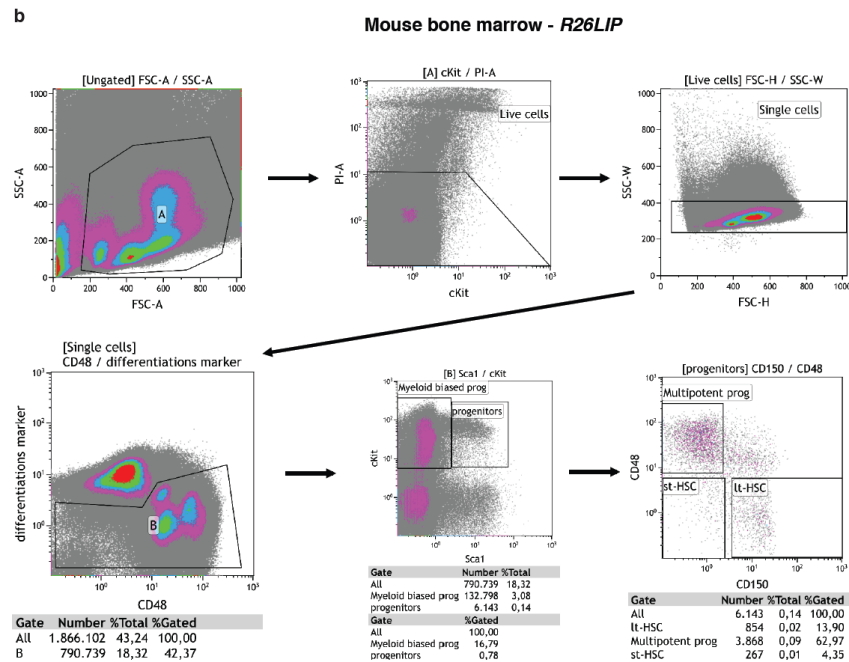

**Supplementary Figure 6** LIP increases progenitor frequency in mouse bone marrow. Gating schedule applied to flow cytometry data from wt (a) and *R26LIP* (b) mice. Cells were gated for forward scattering light (FSC) and side scattering light (SSC) abilities to identify particles/cells of a certain size. In the second graph cells/particles were selected for PI negativity and in the third for single cells. The fourth graph identifies Lin<sup>+</sup> and Lin<sup>-</sup> cells. The Lin<sup>-</sup> fraction was further analysed for c-Kit and Sca1 expression and the c-Kit<sup>+</sup>/Sca1<sup>+</sup> positive fraction was further analysed for CD48 and CD150 expression to identify the fraction of long term (LT) hematopoietic stem cells (HSC), short term (ST) HSC and multipotent progenitors (MPP).

**Supplementary Figure 7** Full scans of immunoblots. The areas used in the figures are boxed.

**Figure 1**

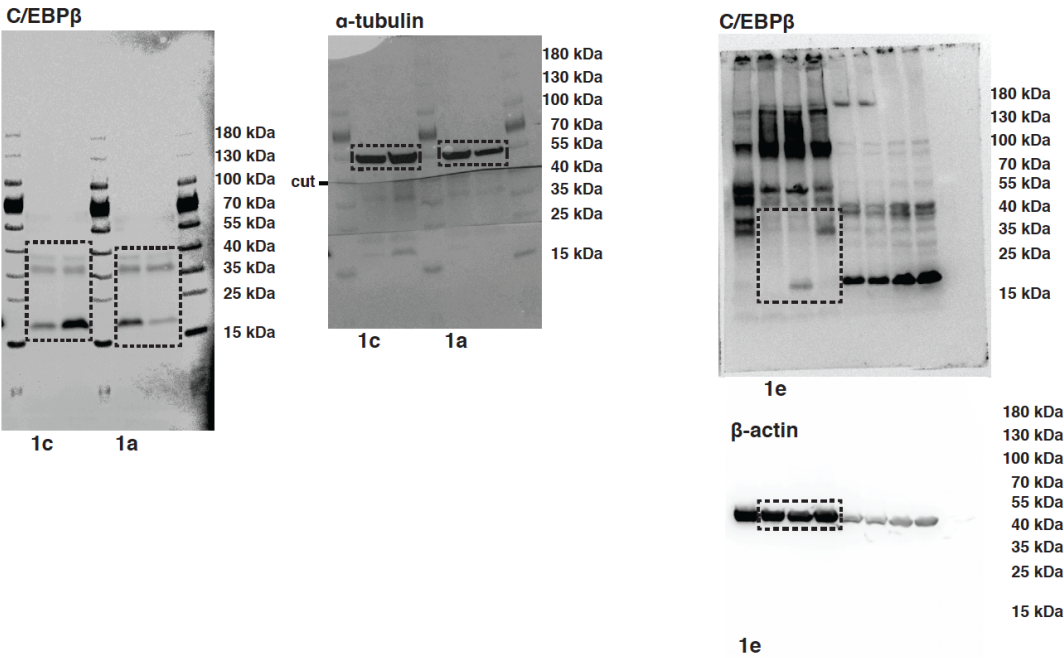

**Figure 3**

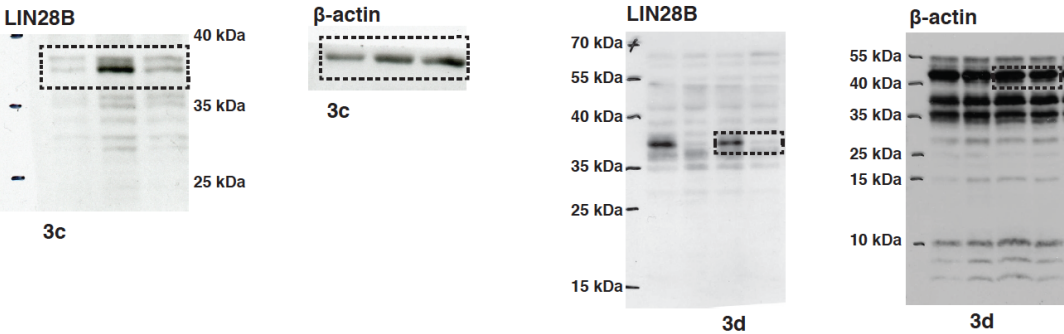

**Supplementary Figure 1**

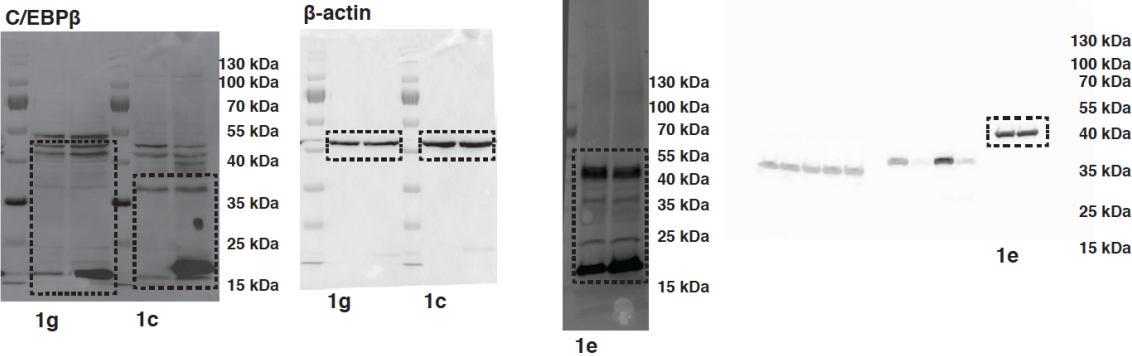

Supplementary Figure 3

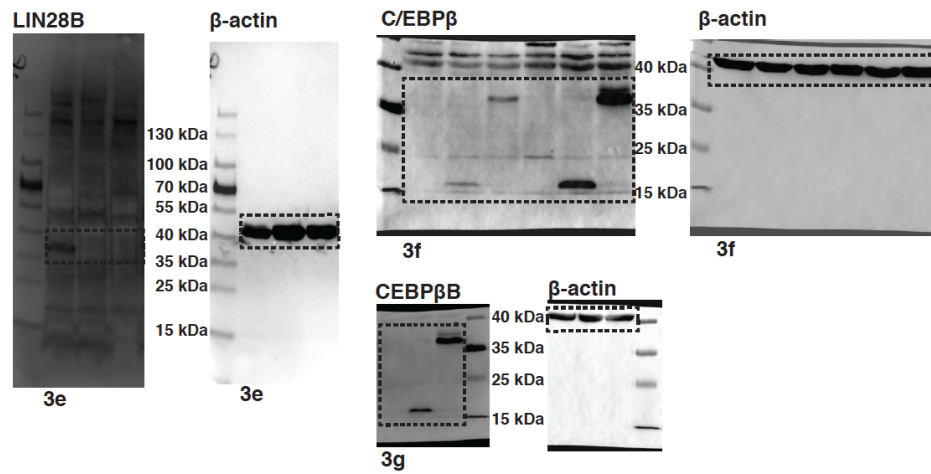

Supplementary Figure 4

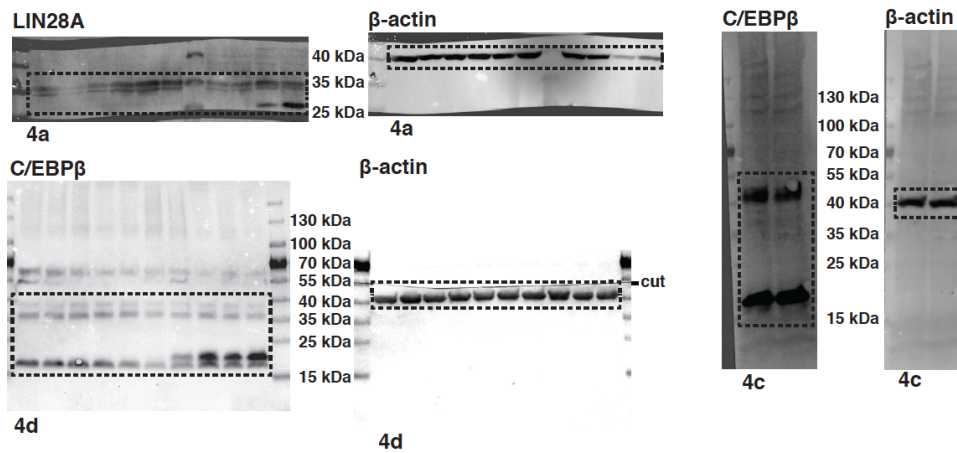

Supplementary Figure 5

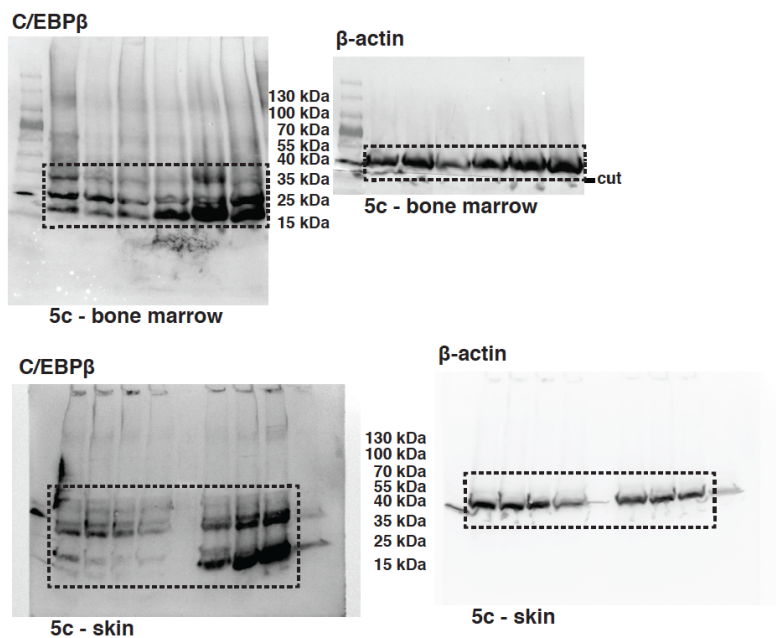

**Supplementary Table 1** changes in mRNA or protein levels in MEFs overexpressing LIP or empty vector (EV) control

Pentose-phosphate pathway, related to Fig. 3e

| mRNA   | DESeq/EdgeR<br>p-value | protein | t-test<br>p-value |
|--------|------------------------|---------|-------------------|
| G6pdx  | 1                      | G6pdx   | 0.05              |
| Pgd    | 1                      | Pgd     | 0.03              |
| Taldo1 | 1                      | Pgl     | 0.85              |
| Hibadh | 1                      | Rpe     | 0.35              |
| Rpe    | 1                      | Rpia    | 0.18              |
| Glyr1  | 1                      |         |                   |
| H6pd   | 0.34                   |         |                   |
| Tpi1   | 1                      |         |                   |
| Pgl    | 1                      |         |                   |

Glycolytic pathway, related to Fig. 3f

| mRNA   | DESeq/EdgeR<br>p value | protein | t-test<br>p value |
|--------|------------------------|---------|-------------------|
| Adpgk  | 1                      | Adpgk   | 0.10              |
| Aldoa  | 1                      | Aldoa   | <0.001            |
| Aldoc  | 0.73                   | Eno1    | 0.42              |
| Bpgm   | 0.44                   | Eno1    | 0.01              |
| Dhtkd1 | 1                      | Eno2    | 0.42              |
| Eno1   | 1                      | Eno3    | 0.73              |
| Eno2   | 1                      | Gapdh   | 0.19              |
| Eno3   | 1                      | Gpi1    | 0.13              |
| Gapdh  | 1                      | Hk1     | 0.04              |
| Gapdhs | 1                      | Hk2     | 0.14              |
| Gpi1   | 1                      | Ist1    | 0.05              |
| Hk1    | 1                      | Ogdh    | 0.04              |
| Hk2    | 1                      | Pdha1   | 0.02              |
| Hkdc1  | 1                      | Pdha2   | 0.42              |
| Ogdh   | 1                      | Pfkl    | 0.50              |
| Pdha1  | 1                      | Pfkm    | 0.53              |
| Pfkb2  | 1                      | Pfkp    | 0.10              |
| Pfkl   | 1                      | Pgam1   | 0.01              |
| Pfkm   | 1                      | Pgk1    | 0.07              |
| Pfkp   | 1                      | Pgk2    | 0.42              |
| Pgam1  | 1                      | Pkm     | 0.04              |
| Pgam2  | 1                      | Pklr    | 0.35              |
| Pgk1   | 1                      | Tpi1    | 0.07              |
| Tpi1   | 1                      |         |                   |

p-values shown are calculated by combining results from DESeq and EdgeR analysis for the mRNAs or Student's t-tests for proteins.

**Supplementary Table 2 C/EBP $\beta$ -associated DNA fragments**

| Cluster                        | location             | C/EBP $\beta$ site position | Cell line                         | Score (out of 1000) | Rel. to start site/ <a href="#">locus</a> | associated with H3K27Ac |
|--------------------------------|----------------------|-----------------------------|-----------------------------------|---------------------|-------------------------------------------|-------------------------|
| let7-a1/f1/d                   | intergenic           | chr9:96929371-96929675      | HeLa-S3, HepG2                    | 308                 | <a href="#">-8559 bp</a>                  | Yes                     |
|                                |                      | chr9:96930928-96931214      | HeLa-S3, IMR90, K562              | 438                 | <a href="#">-7020 bp</a>                  | Yes                     |
| miR-100/<br>let-7a-2/miR125b-1 | intergenic           | chr11:122032890-122033184   | A549, HeLa-S3, IMR90              | 422                 | <a href="#">-15660 bp</a>                 | Yes                     |
|                                |                      | chr11:122009483-122009738   | IMR90                             | 282                 | <a href="#">+7747 bp</a>                  | Yes                     |
|                                |                      | chr11:122007819-122008082   | HeLa-S3, IMR90                    | 330                 | <a href="#">+9148 bp</a>                  | Yes                     |
| let-7a-3/b                     | intergenic           | chr22:46481590-46481877     | A549, HeLa-S3, K562               | 933                 | 0                                         | Yes                     |
|                                |                      | chr22:46501859-46502137     | A549, HeLa-S3, HepG2, IMR90       | 982                 | <a href="#">+19982 bp</a>                 | Yes                     |
| miR-99a/<br>let-7c/miR125b-2   | intronic? (C21orf34) | chr21:17892041-17892304     | HeLa-S3                           | 352                 | <a href="#">-19839 bp</a>                 | No                      |
|                                |                      | chr21:17894923-17895138     | HeLa-S3, IMR90                    | 878                 | <a href="#">-17220 bp</a>                 | No                      |
|                                |                      | chr21:17907438-17907551     | HeLa-S3                           | 555                 | <a href="#">-4592 bp</a>                  | Yes                     |
|                                |                      | chr21:17908980-17909243     | HeLa-S3                           | 326                 | <a href="#">-2900 bp</a>                  | Yes                     |
|                                |                      | chr21:17923366-17923518     | HeLa-S3                           | 654                 | <a href="#">+11130 bp</a>                 | Yes                     |
|                                |                      | chr21:17923911-17924062     | HeLa-S3                           | 983                 | <a href="#">+11675 bp</a>                 | Yes                     |
| miR-99b/<br>let-7e/miR125a     | intergenic           | chr19:52183772-52184057     | A549, H1-hESC, HepG2, IMR90, K562 | 975                 | <a href="#">-12267 bp</a>                 | No                      |
|                                |                      | chr19:52205637-52205912     | K562                              | 307                 | <a href="#">+9598 bp</a>                  | Yes                     |
|                                |                      | chr19:52216011-52216316     | A549, H1-hESC, K562               | 243                 | <a href="#">+19972 bp</a>                 | No                      |
| let-7f-2/miR-98                | intronic (HUWE1)     | chrX:53709195-53709458      | HeLa-S3                           | 196                 | <a href="#">+4215 bp</a>                  | Yes                     |
| let-7g                         | intronic (WDR82)     | chr3:52312731-52312994      | HeLa-S3                           | 200                 | <a href="#">-72 bp</a>                    | Yes                     |
| let-7i                         | intergenic           | chr12:62996121-62996415     | A549, HeLa-S3, IMR90, K562        | 482                 | <a href="#">-1051 bp</a>                  | Yes                     |
|                                |                      | chr12:62997376-62997650     | A549, HeLa-S3, HepG2              | 260                 | <a href="#">+184 bp</a>                   | Yes                     |

Data retrieved from <http://genome.ucsc.edu/ENCODE/>

**Supplementary Table 3** Skin phenotypes, related to Fig. 7a

| <b>ID</b> | <b>Genotype</b> | <b>Skin phenotype</b>                         | <b>Predominant hair follicular type</b> |
|-----------|-----------------|-----------------------------------------------|-----------------------------------------|
| wt 1      | wt              | Normal                                        | Telogen                                 |
| wt 2      | wt              | Normal                                        | Anagen                                  |
| wt 3      | wt              | Normal                                        | Telogen                                 |
| wt 4      | wt              | Normal                                        | Telogen                                 |
| wt 5      | wt              | Normal                                        | Telogen                                 |
| wt 6      | wt              | Normal                                        | Telogen/Anagen                          |
| R26LIP 1  | R26LIP          | Mild patchy epidermal hyperplasia (score 1)   | Telogen                                 |
| R26LIP 2  | R26LIP          | Mild patchy epidermal hyperplasia (score 0.5) | Telogen/Anagen                          |
| R26LIP 3  | R26LIP          | Moderate epidermal hyperplasia (score 2.5)    | Anagen                                  |
| R26LIP 4  | R26LIP          | Normal                                        | Telogen/Anagen                          |
| R26LIP 5  | R26LIP          | Mild patchy epidermal hyperplasia (score 1)   | Telogen/Anagen                          |
| R26LIP 6  | R26LIP          | Mild patchy epidermal hyperplasia (score 0.5) | Telogen                                 |

**Supplementary Table 4** Primer sequences or ordering information in case sequence is not publicly available.

| Target         | Primer 1 forward                                            | Primer 2 reversed         | Figure              | Suppl. Figure |
|----------------|-------------------------------------------------------------|---------------------------|---------------------|---------------|
| Cytochrome b   | CATTTATTATCGCGGCC                                           | TGTTGGGTTGTTTGATCC TG     | 1g                  |               |
| $\beta$ -actin | AGAGGGAAATCGTGCGTGAC                                        | CAATAGTGATGACCTGGC CGT    | 1g                  |               |
| let-7 primers  | let-7 isoform specific primer<br>miScript II RT kit, Qiagen | miScript Universal Primer | 5a, b, c, f, 6a, 7o | 4b, c         |
| let-7a         | UGAGGUAGUAGGUUGUAUAGUU                                      | miScript Universal Primer |                     |               |
| let-7b         | UGAGGUAGUAGGUUGUGUGGUU                                      | miScript Universal Primer |                     |               |
| let-7c         | UGAGGUAGUAGGUUGUAUGGUU                                      | miScript Universal Primer |                     |               |
| let-7d         | AGAGGUAGUAGGUUGCAUAGUU                                      | miScript Universal Primer |                     |               |
| let-7e         | UGAGGUAGGAGGUUGUAUAGUU                                      | miScript Universal Primer |                     |               |
| let-7f         | UGAGGUAGUAGAUUGUAUAGUU                                      | miScript Universal Primer |                     |               |
| let-7g         | UGAGGUAGUAGUUUGUACAGUU                                      | miScript Universal Primer |                     |               |
| let-7i         | UGAGGUAGUAGUUUGUCUGUU                                       | miScript Universal Primer |                     |               |

|              |                                                                        |                     |       |
|--------------|------------------------------------------------------------------------|---------------------|-------|
| Snord72      | Hs_SNORD72_11 miScript Primer Assay (MS00033719), Qiagen               | 5a, b, c, f, 6a, 7o | 4b, c |
| U6           | Hs_RNU6-2_11 miScript Primer Assay (MS00033740), Qiagen                | 5c                  |       |
| Lin28b human | RT <sup>2</sup> qPCR Primer Assay for Human LIN28B (PPH57843B), Qiagen |                     | 3c    |
| Lin28b mouse | RT <sup>2</sup> qPCR Primer Assay for Mouse Lin28b (PPM31163B), Qiagen | 4b, d, 5g, 6b       | 3a,b  |
